## **Synergy pattern of short cationic antimicrobial peptides against multidrug-resistant *Pseudomonas aeruginosa***

**Serge Ruden<sup>1,2</sup>, Annika Rieder<sup>2</sup>, Thomas Schwartz<sup>2</sup>, Ralf Mikut<sup>3\*</sup> and Kai Hilpert<sup>2,4,5</sup>**

<sup>1</sup> Karlsruhe Institute of Technology (KIT), Institute of Biological Interfaces 2, P.O. Box 3640, 76021 Karlsruhe, Germany

<sup>2</sup> Karlsruhe Institute of Technology (KIT), Institute of Functional Interfaces, P.O. Box 3640, 76021 Karlsruhe, Germany

<sup>3</sup> Karlsruhe Institute of Technology (KIT), Institute for Automation and Applied Informatics, P.O. Box 3640, 76021 Karlsruhe, Germany

<sup>4</sup> Karlsruhe Institute of Technology (KIT), Institute of Microstructure Technology, P.O. Box 3640, 76021 Karlsruhe, Germany

<sup>5</sup> Institute of Infection and Immunity, St George's, University of London, Cranmer Terrace, London SW17 0RE, United Kingdom

**\* Correspondence:**

Ralf Mikut

ralf.mikut@kit.edu

**Keywords:** multidrug-resistance, *Pseudomonas aeruginosa*, antimicrobial peptides, synergy, revive old antibiotics.

### **Abstract**

**With the rise of various multi-drug resistance pathogenic bacteria, worldwide health care is under pressure to respond. Conventional antibiotics are failing and the development of novel classes or alternative strategies is a major priority. Antimicrobial peptides (AMPs) can not only kill multi-drug resistant bacteria, but also can be used synergistically with conventional antibiotics. We selected 30 short AMPs from different origins and measured their synergy in combination with Polymyxin B, Piperacillin, Ceftazidime, Cefepime, Meropenem, Imipenem, Tetracycline, Erythromycin, Kanamycin, Tobramycin, Amikacin, Gentamycin, and Ciprofloxacin. In total 403 unique combinations were tested against a multi-drug resistant *Pseudomonas aeruginosa* isolate (PA910). As a measure of the synergistic effects, fractional inhibitory concentrations (FICs) were determined using microdilution assays with FICs ranges between 0.25 and 2. A high number of combinations between peptides and Polymyxin B, Erythromycin and Tetracycline were found to be synergistic. Novel variants of Indolicidin also showed a high frequency in synergist interaction.**

## Introduction

Among the most serious problems health care is facing is the increased number of infections caused by antibiotic-resistant bacteria, which can no longer be treated with previously active antimicrobial agents. The World Health Organization (WHO) identified in 2013 the development of antibiotic resistance as one of the major global threats to human society and recommended intensive monitoring for the identification of critical hot spots, in order to reduce transmission. The global spread of antibiotic resistance is one of the most interesting examples of biological evolution. It is highly relevant to both human and animal health and welfare with a direct impact on society. The primary cause of this situation is the excessive use of antibiotics (Berendonk et al., 2015). Although the environmental bacteria are most probably the original source of many antibiotic resistance genes found in bacterial pathogens, the impact of nosocomial resistance and transmission has greatly increased over the last half century (Bush et al., 2011). The increased prevalence of antibiotic resistance in microbiota is due to four major reasons: i) horizontal transfer of antibiotic resistance genes, ii) the assortment of resistant bacteria due to selective pressures from antimicrobial usage, (iii) the bacterial ability for gene mutation and recombination (e.g. presence of mutator determinants) (Cantón and Morosini, 2011; Davies and Davies, 2010; Wright and Sutherland, 2007) and (iv) the dissemination of resistant organisms from human and animal commensals that have adapted to antibiotic treatment of the host. Importantly, we cannot exclude proliferation of antibiotic resistance due to the spread of resistant bacterial clones and their mobile genetic elements carrying antibiotic-resistance genes, this is due to spontaneous processes not necessarily linked with antibiotic resistance (Baquero et al., 2013; Kohanski et al., 2010; Seiler and Berendonk, 2012). Though the over-use of antibiotics may select for resistant populations, other biotic and abiotic factors including physicochemical conditions, pollution, induction of stress responses, bacterial adaptation and phenotypic heterogeneity among others, can enhance the effect of selective pressure. Evidence has shown that even in sub-inhibitory concentration antibiotics may still exert their impact on microbial community (Andersson and Hughes, 2014).

The review on antimicrobial resistance chaired by Jim O'Neill, initiated by the UK prime minister in 2014, published 2016 estimates that by 2050 more people (10 million) will die each year from infections than current number of people who die from cancer (<https://amr-review.org/Publications.html>). In order to maintain modern medical standards of care, it is a matter of urgency that novel antimicrobials are discovered and developed, particularly those with novel modes of action, which are less likely to suffer cross-resistance to existing drugs. The WHO published a priority list in 2017 (<http://www.who.int/news-room/detail/27-02-2017-who-publishes-list-of-bacteria-for-which-new-antibiotics-are-urgently-needed>) of bacteria that are especially problematic, in order to provide information and focus for drug development projects. In the highest category is carbapenem-resistant *Pseudomonas aeruginosa*.

*Pseudomonas aeruginosa* is a rod-shaped, Gram-negative bacterium, which is naturally found in soil and water and therefore well adapted to humid environments. It is a clinically important, opportunistic pathogen, which may cause pneumonia and bacteraemia in the elderly or immuno-compromised hosts. It is responsible for chronic, destructive lung disease in patients suffering from cystic fibrosis (Bhagirath et al., 2016). *P. aeruginosa* exhibits a higher intrinsic resistance to a number of antimicrobial agents compared to most other Gram-negative bacteria (Yoneda et al., 2005). Additionally, rapid development of resistance to previously effective antimicrobials, such as fluoroquinolones, sulfonamides or macrolides has been observed (Breidenstein et al., 2011; Ellington and Woodford, 2006; Oh et al., 2003; Sköld, 2000).

Unfortunately, there has been a significant reduction in the development of novel antimicrobial agents with many major pharmaceutical companies halting research in anti-infective agents. The fact there are very few new antimicrobial agents with a new mode of action increases the risk of a nightmare scenario where even “minor” infections could become serious health risks. As there is already only a limited number of anti-pseudomonal antibiotics and increasing prevalence of resistance, it is an important question as to whether potential new antibiotics with different modes of action also synergise with “old” antimicrobials, especially for multi-drug resistant (MDR) bacteria. Antimicrobial peptides (AMPs) are potential novel antimicrobial drugs with some much-desired features, for example low chance for development of resistance, fast acting, broad spectrum activity and active against MDR bacteria. So far only a few have been enrolled in clinical studies (Czaplewski et al., 2016; Greber and Dawgul, 2017). In this study we investigated whether synergy exists between designed short, cationic AMPs and conventional antibiotics in MDR *P. aeruginosa* or not. Such a synergy could be a starting point for further optimization to re-use already clinically valuable antibiotics.

## **Material and Methods**

### **Peptides and antibiotics**

All peptides used in this study were purchased from the Brain-Research Centre at the University of British Columbia. Peptides were characterized and purified via high-performance liquid chromatography (HPLC), mass was confirmed by matrix assisted laser desorption time of flight (MALDI-TOF) mass spectroscopy. Purity of all peptides was greater than 90%.

All antibiotics were purchased from VWR, except Polymyxin B, which was purchased from Sigma-Aldrich.

### **Minimal inhibitory concentration (MIC)**

We selected six different *P. aeruginosa* isolates that were described as multi-drug resistant and had been isolated from clinical or municipal waste water (Schwartz et al., 2006). The MIC was determined in a microdilution assay using Mueller-Hinton broth (MH) following a previous published protocol (Wiegand et al., 2008). Briefly, a twofold serial dilution of the antibiotics and peptides were prepared and added to a bacteria solution resulting in  $2-5 \times 10^5$  CFU/ml. The microtiter plates (polypropylene, Corning) were incubated for 18 h at 37 °C and MIC were taken visually.

### **Fractional inhibitory concentration (FIC)**

The checkerboard assay was used to determine the FICs, following the protocol described in Koneman's Color Atlas and Textbook of Diagnostic Microbiology (Winn Jr et al., 2006). Briefly, combinations of peptides and antibiotics were prepared in 96 well plates (polypropylene, Corning) in a twofold dilution series. After the addition of a log-phase bacterial inoculum of  $2-5 \times 10^5$  CFU/ml, plates were incubated at 37 °C for 18 h. The FICs were determined by visual inspection. The effects of the combinations were determined using the FICs. The FIC was computed by adding two partial FIC values,  $FIC_A$  - the MIC of drug A, tested in combination with drug B divided by the MIC of drug A,

tested alone and  $FIC_B$  - the MIC of drug B, tested in combination with drug A divided by the MIC of drug B, tested alone ( $FIC = FIC_A + FIC_B = (MIC_{AB}/MIC_A) + (MIC_{BA}/MIC_B)$ , where  $MIC_A$  and  $MIC_B$  are the MICs of drugs A and B alone, respectively, and  $MIC_{AB}$  and  $MIC_{BA}$  are the MIC concentrations of the drugs in combination). Here we use the European Committee for Antimicrobial Susceptibility Testing (EUCAST) definition, which is very similar to the definition provided by Odds 2003, except Odds define additive effects when FIC values are between 0.5 and 1 (European Committee for Antimicrobial Susceptibility Testing (EUCAST) of the European Society of Clinical Microbiology and Infectious Diseases (ESCMID), 2000; Odds, 2003). The combination of peptide (drug A) and antibiotics (drug B) was defined as synergistic if the FIC was  $\leq 0.5$ , indifferent if the FIC was  $>0.5$  but  $\leq 4.0$  and antagonistic if the FIC was  $>4$ .

## Results

First, we have determined the MIC values against a range of different antibiotics for all six strains of *P. aeruginosa*, that were described as multi-drug resistant and had been isolated from clinical or municipal waste water, in comparison with a sensitive wild type strain (PAO1), see Table 1 (Schwartz et al., 2006). This confirmed that these strains are multi-drug resistant.

| Antibiotic/Strain | PA01-wt  | PA 910  | PA 915  | PA 919 | PA 923 | PA 927 | PA253 |
|-------------------|----------|---------|---------|--------|--------|--------|-------|
| Polymyxin B       | 0.125    | 0.125   | 0.25    | 0.125  | 0.25   | 0.25   | 0.125 |
| Ciprofloxacin     | 0.25     | 64      | 32      | 64     | 64     | 16     | 64    |
| Tobramycin        | 0.25-0.5 | 32      | 64      | 64     | 32     | 32     | 64    |
| Gentamycin        | 1        | 128     | 128-256 | 128    | 128    | 128    | >256  |
| Amikacin          | 1        | 2-4     | 4       | 32     | 4      | 4      | 8-16  |
| Imipenem          | 2        | >128    | >128    | 16     | >128   | >128   | >128  |
| Meropenem         | 2-4      | >128    | >128    | >128   | >128   | >128   | >128  |
| Piperacillin      | 4        | 64-128  | >256    | 64     | 128    | 256    | >256  |
| Ceftazidime       | 4        | 128     | 4       | 8      | 128    | >128   | >128  |
| Tetracyclin       | 8        | 64      | 16      | 32     | >512   | 16     | 32    |
| Cefepime          | 8        | 64      | 32      | 16     | 64     | 128    | >128  |
| Kanamycin         | 64       | 128-256 | 256-512 | 128    | 256    | 128    | >512  |
| Erythromycin      | 128      | 128     | 64      | 128    | 256    | 16     | 64    |

**Table 1** MIC determination measured at least in triplicates ( $n=3$ ) against wild type *P. aeruginosa* and MDR isolates (values in  $\mu M$ )

A set of short peptides between 9 and 13 amino acids in length were selected from already published and from ongoing unpublished work (Cherkasov et al., 2009; Hilpert et al., 2005, 2006; Mikut et al., 2016), LL37 was used as a comparison to long and helical peptides. The MIC values of the peptides against the wild type *P. aeruginosa* strain as well as three selected MDR variants of PA910, PA919 and PA253 were determined (Table 2). The majority of MIC values were equal or similar (plus/minus

factor of 2) between the wild type and the MDR strains, with the highest change observed for Indolicidin with a 8-fold decrease in activity. Since the wt PA01 shows in some cases a higher sensitivity towards the antimicrobial peptides we tested with three peptides if this relates to the MDR phenotype or the adaption to a specific environment. We tested 25 clinical isolates with full sensitivity and 25 clinical isolates with various resistance and MDR pattern (data not shown). Nearly identical MIC variations were determined in both groups, demonstrating that the observed sensitivity of the wt strain is not related to the missing expression/carriage of resistant genes.

| Name                  | Amino Acid Sequence             | MIC against MDR isolates of PA / $\mu$ M |       |       |        |
|-----------------------|---------------------------------|------------------------------------------|-------|-------|--------|
|                       |                                 | PA01 wt                                  | PA910 | PA919 | PA253  |
| Bac2a <sup>1</sup>    | RLARIVVIRVAR-CONH <sub>2</sub>  | 16                                       | 32    | 16    | 32     |
| G2 <sup>2</sup>       | RGARIVVIRVAR-CONH <sub>2</sub>  | 32                                       | 32    | 16    | 32     |
| R2 <sup>2</sup>       | RRARIVVIRVAR-CONH <sub>2</sub>  | 32                                       | 32    | 16    | 32     |
| W3 <sup>2</sup>       | RLWRIVVIRVAR-CONH <sub>2</sub>  | 16                                       | 32    | 32    | 32     |
| R3 <sup>2</sup>       | RLRRIVVIRVAR-CONH <sub>2</sub>  | 16                                       | 32    | 16    | 16     |
| W10 <sup>2</sup>      | RLARIVVIRWAR-CONH <sub>2</sub>  | 16                                       | 16    | 16    | 16     |
| R11 <sup>2</sup>      | RLARIVVIRVRR-CONH <sub>2</sub>  | 16                                       | 64    | 32    | 64     |
| Sub 3 <sup>2</sup>    | RRWRIVVIRVRR-CONH <sub>2</sub>  | 8                                        | 16    | 16    | 8      |
| Sub 7                 | RLWRIVVIRVKR-CONH <sub>2</sub>  | 16                                       | 32    | 32    | 16     |
| Bac034 <sup>3</sup>   | VRLRIRVAVIRA-CONH <sub>2</sub>  | 32                                       | 64    | 32    | 64     |
| W3 <sup>3</sup>       | VRWRIRVAVIRA-CONH <sub>2</sub>  | 8                                        | 16    | 8     | 16     |
| HHC-53 <sup>4</sup>   | FRRWWKWFK-CONH <sub>2</sub>     | 8                                        | 32    | 16    | 8      |
| Indolic. <sup>6</sup> | ILPWKWPWRR- CONH <sub>2</sub>   | 8                                        | 32    | 32    | 64-128 |
| LL37                  | ##                              | 16                                       | 64    | 16    | 64     |
| LOP1 <sup>5</sup>     | RWWRKIWKW-CONH <sub>2</sub>     | 2                                        | 8     | 2-4   | 8      |
| LOP2 <sup>5</sup>     | RRWWRWVW-CONH <sub>2</sub>      | 4                                        | 8     | 2     | 8      |
| LOP3 <sup>5</sup>     | KRRWRIWL-CONH <sub>2</sub>      | 4                                        | 8     | 4     | 4-8    |
| LOP4 <sup>5</sup>     | RRWRVIVKW-CONH <sub>2</sub>     | 4                                        | 4     | 4     | 8      |
| LOP5 <sup>5</sup>     | WKWLKKWIK-CONH <sub>2</sub>     | 4                                        | 8     | 8     | 8      |
| Indopt 1              | FIKWKKRWKKRT-CONH <sub>2</sub>  | 4                                        | 8     | 32    | 16     |
| Indopt 2              | FIKWRFRWKKRT-CONH <sub>2</sub>  | 4                                        | 8     | 32    | 16     |
| Indopt 3              | FIKWRSRWKKRT-CONH <sub>2</sub>  | 4                                        | 8     | 32    | 16     |
| Indopt 4              | FIKWRFRWKKRK-CONH <sub>2</sub>  | 4                                        | 4-8   | 16-32 | 8      |
| Indopt 5              | FIKWKFRPWKKRT-CONH <sub>2</sub> | 4                                        | 8     | 16-32 | 16     |
| Indopt 6              | FIKRKSRWKKWRT-CONH <sub>2</sub> | 4                                        | 8     | 32    | 8-16   |
| Indopt 7              | ILKWKRKWWKWFR-CONH <sub>2</sub> | 2                                        | 4     | 32    | 8      |
| Indopt 8              | ILKWKKGWKWFR-CONH <sub>2</sub>  | 4                                        | 4     | 16    | 8      |
| Indopt 9              | ILKWKRKWWKWRR-CONH <sub>2</sub> | 1                                        | 2     | 16    | 4      |
| Indopt 10             | ILKWKIFKWKWFR-CONH <sub>2</sub> | 2                                        | 4     | 32    | 8-16   |
| Indopt 11             | ILKWTKWKKWFR-CONH <sub>2</sub>  | 2                                        | 4     | 16    | 4      |
| Indopt 12             | ILKWKMFKWKWFR-CONH <sub>2</sub> | 2                                        | 4     | 16    | 16     |

**Table 2** MIC values in  $\mu$ M of short AMPs (9-13mer) measured in triplicates (n=3) against several isolates of MDR *P. aeruginosa*. MIC values of all Indopt variants were measured in 1/8 MHb, whilst all other were measured in full MHb.. A 37mer human AMP was included as compassion (LL37). ## The sequence of the peptide LL-37: LLGDFFRKSKEKIGKEFKRIVQRIKDFLRNLPRTES-COOH. <sup>1</sup> (Wu and Hancock, 1999), <sup>2</sup> (Hilpert et al., 2005), <sup>3</sup> (Hilpert et al., 2006), <sup>4</sup> (Cherkasov et al., 2009), <sup>5</sup> (Mikut et al., 2016), <sup>6</sup> (Selsted et al., 1992)

Strain PA 910, which is only sensitive to Polymyxin B and Amikacin was selected to perform a synergy study combining 31 antimicrobial peptides with 12 antibiotics and 1 lipopeptide (Polymyxin B) resulting in 403 unique combinations.

|                       |                                |                                    | Antibiotic                                                     |      |      |      |        |      |         |      |      |      |      |      |      |
|-----------------------|--------------------------------|------------------------------------|----------------------------------------------------------------|------|------|------|--------|------|---------|------|------|------|------|------|------|
|                       |                                |                                    | PMB                                                            | CEF  | MER  | IMI  | PIP    | CET  | KAN     | TOB  | GEN  | AMI  | ERY  | TET  | CIP  |
|                       |                                |                                    | MIC against PA910 in $\mu\text{M}$                             |      |      |      |        |      |         |      |      |      |      |      |      |
|                       |                                |                                    | 0.13                                                           | 128  | >128 | >128 | 64-128 | 64   | 128-256 | 32   | 128  | 2-4  | 128  | 64   | 64   |
| Peptide               | Sequence                       | MIC against PA910 in $\mu\text{M}$ | FIC values of combinations of peptides and short AMPs on PA910 |      |      |      |        |      |         |      |      |      |      |      |      |
| Bac2a <sup>1</sup>    | RLARIVVIRVAR-CONH <sub>2</sub> | 32                                 | 0.38                                                           | 2    | 2    | 0.63 | 1      | 0.75 | 0.38    | 1    | 0.75 | 1    | 0.5  | 0.5  | 0.5  |
| G2 <sup>2</sup>       | RGARIVVIRVAR-CONH <sub>2</sub> | 32                                 | 0.38                                                           | 2    | 0.51 | 0.5  | 0.56   | 0.63 | 0.56    | 0.53 | 0.75 | 1    | 0.38 | 0.63 | 0.5  |
| R2 <sup>2</sup>       | RRARIVVIRVAR-CONH <sub>2</sub> | 32                                 | 2                                                              | 2    | 0.26 | 0.5  | 0.56   | 0.51 | 0.38    | 2    | 0.75 | 1    | 0.27 | 0.38 | 0.63 |
| W3 <sup>2</sup>       | RLWRIVVIRVAR-CONH <sub>2</sub> | 32                                 | 2                                                              | 2    | 0.56 | 0.5  | 0.63   | 0.63 | 0.5     | 2    | 0.56 | 0.51 | 0.5  | 0.38 | 0.63 |
| R3 <sup>2</sup>       | RLRRIVVIRVAR-CONH <sub>2</sub> | 32                                 | 0.63                                                           | 0.63 | 0.51 | 0.75 | 0.56   | 1    | 0.56    | 0.63 | 0.5  | 2    | 0.5  | 0.5  | 0.75 |
| Sub 3 <sup>2</sup>    | RRWRIVVIRVRR-CONH <sub>2</sub> | 16                                 | 0.56                                                           | 0.56 | 2    | 0.63 | 1      | 0.75 | 1       | 2    | n.d. | 0.75 | 0.75 | 0.5  | 0.5  |
| R11 <sup>2</sup>      | RLARIVVIRVRR-CONH <sub>2</sub> | 64                                 | 0.63                                                           | 2    | 0.51 | 0.63 | 1      | 1    | 0.5     | 2    | n.d. | 2    | 0.53 | 0.53 | 0.53 |
| Sub 7                 | RLWRIVVIRVKR-CONH <sub>2</sub> | 32                                 | 1                                                              | 0.56 | 0.51 | 2    | 0.53   | 0.56 | 0.63    | 2    | n.d. | 0.53 | 0.5  | 0.5  | 0.75 |
| W10 <sup>2</sup>      | RLARIVVIRWAR-CONH <sub>2</sub> | 16                                 | 2                                                              | 2    | 0.26 | 0.75 | 0.75   | 0.38 | 0.63    | 0.51 | n.d. | 0.75 | 0.5  | 0.29 | 0.56 |
| S-W3 <sup>3</sup>     | VRWRIRVAVIRA-CONH <sub>2</sub> | 16                                 | 0.5                                                            | 1    | 0.75 | 0.51 | 0.56   | 0.75 | 0.56    | 2    | 0.63 | 0.63 | 0.51 | 0.25 | 0.63 |
| Bac034 <sup>3</sup>   | VRLRIRVAVIRA-CONH <sub>2</sub> | 64                                 | 0.5                                                            | 0.53 | 0.75 | 0.75 | 1      | 0.5  | 0.75    | 2    | 0.63 | 0.51 | 0.63 | 0.75 | 0.5  |
| HHC-53 <sup>4</sup>   | FRRWWKWK-CONH <sub>2</sub>     | 32                                 | 0.56                                                           | 2    | 0.53 | 1    | 0.63   | 1    | 0.5     | 0.5  | 0.63 | 0.53 | 0.75 | 0.63 | 1    |
| LOP1 <sup>5</sup>     | RWWRKIWK-CONH <sub>2</sub>     | 8                                  | 0.75                                                           | 2    | 1    | 1    | 0.63   | 0.51 | 0.75    | 2    | 0.75 | 0.51 | 0.53 | 0.63 | 0.75 |
| LOP2 <sup>5</sup>     | RRWRVWVW-CONH <sub>2</sub>     | 8                                  | 0.56                                                           | 2    | 1    | 0.75 | 0.63   | 2    | 0.56    | 2    | 2    | 2    | 0.75 | 0.75 | 0.63 |
| LOP3 <sup>5</sup>     | KRRWRIWL-CONH <sub>2</sub>     | 8                                  | 0.38                                                           | 0.53 | 0.5  | 0.75 | 0.56   | 0.75 | 1       | 0.63 | 0.5  | 0.75 | 0.5  | 1    | 0.63 |
| LOP4 <sup>5</sup>     | RRWRVIVKW-CONH <sub>2</sub>    | 4                                  | 1                                                              | 2    | 0.63 | 2    | 2      | 2    | 0.75    | 0.75 | 1    | 1    | 0.5  | 0.56 | 0.75 |
| LOP5 <sup>5</sup>     | WKWLKKWIK-CONH <sub>2</sub>    | 8                                  | 0.38                                                           | 0.56 | 0.5  | 0.51 | 0.51   | 0.5  | 2       | 2    | 0.63 | 1    | 0.75 | 0.63 | 1    |
| Indolic. <sup>6</sup> | ILPWKWPWWPWR-CONH <sub>2</sub> | 32                                 | 0.5                                                            | 2    | 0.63 | 0.63 | 0.56   | 0.51 | 0.75    | 0.5  | 0.5  | 0.5  | 0.63 | 0.5  | 1    |



|           |                                 |     |      |      |      |      |      |      |      |      |      |      |      |      |      |
|-----------|---------------------------------|-----|------|------|------|------|------|------|------|------|------|------|------|------|------|
| Indopt 1  | FIKWKRRWWKKRT-CONH <sub>2</sub> | 8   | 0.25 | 0.56 | 0.75 | 0.63 | 0.63 | 1    | 0.63 | 0.38 | 0.25 | 0.38 | 0.75 | 0.56 | 1    |
| Indopt 2  | FIKWRFRWWKKRT-CONH <sub>2</sub> | 8   | 0.25 | 0.56 | 0.50 | 0.63 | 0.56 | 1    | 0.75 | 0.25 | 0.25 | 0.31 | 0.75 | 0.5  | 0.75 |
| Indopt 3  | FIKWSRWWKKRT-CONH <sub>2</sub>  | 8   | 0.38 | 0.56 | 0.38 | 0.63 | 0.63 | 1    | 0.75 | 0.38 | 0.25 | 0.31 | 0.53 | 1    | 0.75 |
| Indopt 4  | FIKWRFRWWKKRK-CONH <sub>2</sub> | 4-8 | 0.25 | 2    | 0.63 | 0.75 | 0.53 | 1    | 0.5  | 0.25 | 0.38 | 0.31 | 0.53 | 0.5  | 0.5  |
| Indopt 5  | FIKWKFRPWKKRT-CONH <sub>2</sub> | 8   | 0.38 | 2    | 0.75 | 1    | 0.75 | 2    | 0.75 | 0.56 | 0.38 | 0.63 | 0.53 | 0.75 | 1    |
| Indopt 6  | FIKRKSRWWKWRT-CONH <sub>2</sub> | 8   | 0.38 | 0.63 | 0.75 | 0.75 | 0.75 | 2    | 0.5  | 0.38 | 0.25 | 0.38 | 1    | 0.5  | 0.75 |
| Indopt 7  | ILKWKRRWWKWFR-CONH <sub>2</sub> | 4   | 0.38 | 0.53 | 0.53 | 2    | 2    | 1    | 2    | 0.38 | 0.75 | 0.5  | 0.5  | 0.75 | 0.75 |
| Indopt 8  | ILKWKKGWWKWFR-CONH <sub>2</sub> | 4   | 0.38 | 2    | 0.63 | 0.75 | 0.56 | 0.75 | 1    | 0.50 | 0.75 | 0.63 | 0.5  | 0.56 | 0.75 |
| Indopt 9  | ILKWKRRWWKWRR-CONH <sub>2</sub> | 2   | 0.75 | 2    | 0.63 | 2    | 0.75 | 2    | 0.75 | 0.63 | 0.63 | 0.5  | 0.75 | 0.75 | 0.75 |
| Indopt 10 | ILKWKIFKWKWFR-CONH <sub>2</sub> | 4   | 0.75 | 2    | 0.50 | 0.63 | 1    | 0.56 | 2    | 0.75 | 0.63 | 0.75 | 0.38 | 1    | 1    |
| Indopt 11 | ILKWKTKWWKWFR-CONH <sub>2</sub> | 4   | 0.50 | 2    | 1.00 | 0.75 | 0.53 | 1    | 0.56 | 0.75 | 0.75 | 0.75 | 0.56 | 0.63 | 1    |
| Indopt 12 | ILKWKMFKWKWFR-CONH <sub>2</sub> | 4   | 0.75 | 2    | 1.00 | 1    | 0.51 | 1    | 1    | 0.75 | 0.75 | 0.63 | 0.5  | 2    | 1    |
| LL37      | ##                              | 64  | 0.63 | 2    | 0.51 | 1    | 2    | 0.75 | 1    | 2    | 2    | 2    | 0.51 | 0.5  | 0.51 |

2 **Table 3:** Fractional inhibitory concentrations (FICs) of short AMPs, 9-13mers, and different antibiotic were determined once (n=1) against  
3 an MDR isolate of *P. aeruginosa* (PA 910). All FICs were determined once using MHb, for the Indopt versions, 1/8 MHb was used. FIC values  
4 equal or smaller than 0.5 are considered as synergistically interaction and highlighted in white colour on black background. FIC values equal  
5 or smaller than 0.6 (a 20% error margin) are considered as potentially synergistic and were labelled in grey. PMB was used for the lipopeptide  
6 Polymyxin B, which is acting on cell wall and membrane, colour code in orange. Piperacillin (PIP) is of the ureidopenicillin class, Cefazidime  
7 (CET) third-generation cephalosporin, Cefepime (CEF) fourth-generation cephalosporin, Meropenem (MER) and Imipenem (IMI) are part  
8 of the carbapenem subgroup. They all act on the cell wall, especially cell wall synthesis, colour coded in green. Tetracycline (TET),  
9 Erythromycin (ERY), Kanamycin (KAN), Tobramycin (TOB), Amikacin (AMI) and Gentamycin (GEN) are all acting at different sites of the  
10 bacterial ribosomes, colour coded in light blue. Ciprofloxacin (CIP) is a gyrase inhibitor abs acts on the DNA replication system, colour  
11 coded in grey. ## The sequence of the peptide LL-37: LLGDFFRKSKEKIGKEFKRIVQRIKDFLRNLPRTES-COOH, n.d. stands for not  
12 determined in this test.

13 The synergistic effects of combination of short antimicrobial peptides and conventional antibiotics  
14 resulted in a complex pattern. There were peptides that show no synergistic effect, whilst others showed  
15 a variety, similar to the tested antibiotics, see Figure 1A and B.

16

17 Figure 1A

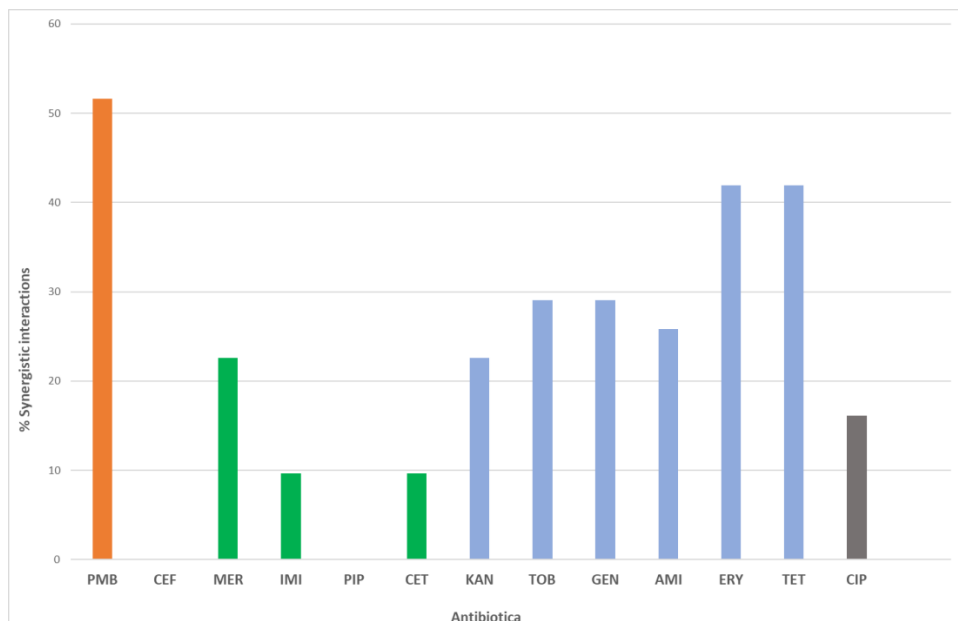

18

19

20 Figure 1B

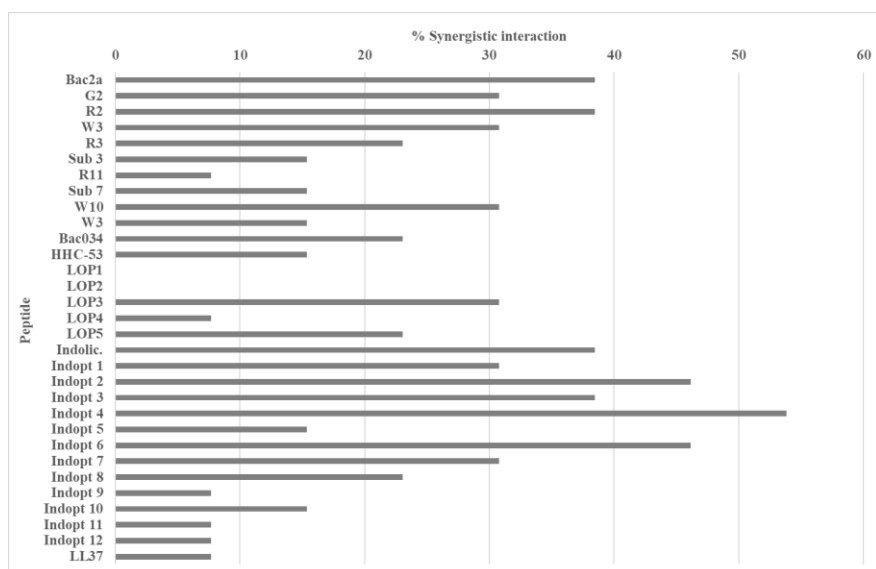

21

22 **Figure 1:** The maximal number of possible interactions was set to 100% and the percent synergistic  
23 interaction was calculated for A) conventional antibiotics and B) short antimicrobial peptides. Colour  
24 codes and abbreviations see Table 3

25

26 Selected peptide-antibiotic combinations were tested three times to confirm first findings, see Table 4.

27

| Peptide               | Antibiotic     |                |                |                |     |                |                |                |                |                |                |                |                |
|-----------------------|----------------|----------------|----------------|----------------|-----|----------------|----------------|----------------|----------------|----------------|----------------|----------------|----------------|
|                       | PMB            | CEF            | MER            | IMI            | PIP | CET            | KAN            | TOB            | GEN            | AMI            | ERY            | TET            | CIP            |
| Bac2a <sup>1</sup>    | 0.47<br>(0.09) |                |                |                |     |                | 0.63<br>(0.17) |                |                |                | 0.69<br>(0.21) | 0.44<br>(0.08) | 1.08<br>(0.61) |
| G2 <sup>2</sup>       | 0.45<br>(0.16) |                |                | 1.00<br>(0.70) |     |                |                |                |                |                | 0.63<br>(0.25) | 0.53<br>(0.01) | 0.59<br>(0.11) |
| R2 <sup>2</sup>       | 1.09<br>(0.79) |                |                | 1.00<br>(0.70) |     |                | 0.63<br>(0.17) |                |                |                | 0.42<br>(0.10) | 0.38<br>(0.10) |                |
| W3 <sup>2</sup>       | 1.17<br>(0.72) |                |                | n.d.           |     |                | 0.67<br>(0.11) |                |                |                | 0.67<br>(0.11) | 0.38<br>(0.25) |                |
| R3 <sup>2</sup>       | 0.46<br>(0.14) |                |                |                |     |                |                | n.d.           | 0.67<br>(0.11) |                | 1.04<br>(0.64) | 0.46<br>(0.05) |                |
| Sub 3 <sup>2</sup>    |                |                |                |                |     |                |                |                |                |                |                | 0.50<br>(0.00) | n.d.           |
| R11 <sup>2</sup>      | 0.42<br>(0.14) |                |                |                |     |                | 0.75<br>(0.17) |                |                |                |                | 0.43<br>(0.12) |                |
| Sub 7                 | 0.67<br>(0.31) |                |                |                |     |                |                |                |                |                | n.d.           | 0.46<br>(0.06) |                |
| W10 <sup>2</sup>      |                |                | n.d.           |                |     | n.d.           |                |                |                |                | n.d.           | 0.60<br>(0.27) |                |
| S-W3 <sup>3</sup>     | 0.81<br>(0.59) |                |                |                |     |                |                |                |                |                | 0.46<br>(0.11) | 0.34<br>(0.06) |                |
| Bac034 <sup>3</sup>   | 0.43<br>(0.12) | 0.59<br>(0.11) | 0.58<br>(0.11) |                |     | 0.50<br>(0.00) |                |                |                |                |                | 0.50<br>(0.17) | 0.75<br>(0.17) |
| HHC-53 <sup>4</sup>   | 0.46<br>(0.10) |                |                |                |     |                | 0.60<br>(0.10) |                | 0.54<br>(0.06) |                |                | 0.52<br>(0.10) |                |
| LOP1 <sup>5</sup>     | 0.55<br>(0.18) |                |                |                |     |                |                |                |                |                |                | 0.55<br>(0.19) |                |
| LOP2 <sup>5</sup>     | 0.60<br>(0.13) |                |                |                |     |                |                |                |                |                |                |                |                |
| LOP3 <sup>5</sup>     | 0.40<br>(0.04) |                | 0.75<br>(0.17) |                |     |                |                |                | 0.50<br>(0.00) |                | 0.44<br>(0.08) | 0.71<br>(0.19) |                |
| LOP4 <sup>5</sup>     |                |                |                |                |     |                |                |                |                |                | n.d.           |                |                |
| LOP5 <sup>5</sup>     | 0.38<br>(0.00) |                | 0.54<br>(0.06) |                |     | n.d.           |                |                |                |                | 0.50<br>(0.17) | 0.50<br>(0.10) |                |
| Indolic. <sup>6</sup> | n.d.           |                |                |                |     | 0.71<br>(0.21) |                | n.d.           |                | n.d.           |                | n.d.           |                |
| Indopt 1              | 0.35<br>(0.10) |                | 0.59<br>(0.14) |                |     | 0.59<br>(0.29) |                | 0.38<br>(0.00) | 0.21<br>(0.03) | 0.38<br>(0.00) | 0.48<br>(0.18) |                |                |
| Indopt 2              | 0.38<br>(0.08) |                | 0.54<br>(0.06) |                |     |                |                | 0.29<br>(0.03) | 0.19<br>(0.04) | 0.32<br>(0.04) |                | 0.75<br>(0.17) |                |
| Indopt 3              | 0.33<br>(0.06) |                | 0.38<br>(0.00) |                |     |                |                | 0.33<br>(0.06) | 0.23<br>(0.10) | 0.37<br>(0.08) | 0.47<br>(0.06) |                |                |
| Indopt 4              | 0.29<br>(0.06) |                | 0.50<br>(0.09) |                |     |                | 0.60<br>(0.10) | 0.27<br>(0.07) | 0.23<br>(0.03) | 0.31<br>(0.04) |                | 0.59<br>(0.10) | 0.63<br>(0.25) |
| Indopt 5              | 0.33<br>(0.06) |                | 0.47<br>(0.19) |                |     |                |                | 0.52<br>(0.03) | 0.35<br>(0.03) | 0.55<br>(0.05) |                |                |                |
| Indopt 6              | 0.38<br>(0.00) |                | 0.52<br>(0.15) |                |     |                | 0.55<br>(0.06) | 0.38<br>(0.08) | 0.27<br>(0.07) | 0.38<br>(0.00) |                | 0.50<br>(0.00) |                |
| Indopt 7              | 0.38<br>(0.00) |                |                |                |     |                |                | 0.67<br>(0.22) |                | 0.55<br>(0.05) | 0.50<br>(0.00) |                |                |
| Indopt 8              | 0.29<br>(0.06) |                | 0.54<br>(0.06) |                |     |                |                | 0.58<br>(0.11) |                |                | 0.45<br>(0.07) |                |                |

|                  |                |  |                |  |  |  |                |  |                |                |      |  |
|------------------|----------------|--|----------------|--|--|--|----------------|--|----------------|----------------|------|--|
| <b>Indopt 9</b>  | 0.54<br>(0.14) |  |                |  |  |  | 0.46<br>(0.14) |  | 0.51<br>(0.01) |                |      |  |
| <b>Indopt 10</b> | 0.46<br>(0.19) |  | 0.52<br>(0.03) |  |  |  | 0.63<br>(0.17) |  |                | 0.38<br>(0.00) |      |  |
| <b>Indopt 11</b> | 0.46<br>(0.06) |  |                |  |  |  | 0.52<br>(0.15) |  |                |                |      |  |
| <b>Indopt 12</b> | 0.48<br>(0.18) |  |                |  |  |  |                |  |                | 0.59<br>(0.06) |      |  |
| <b>LL37</b>      |                |  |                |  |  |  |                |  |                |                | n.d. |  |

28

29 **Table 4:** Mean values of at least three measurements ( $n=3$ ) and standard deviation, values in brackets,  
 30 of fractional inhibitory concentrations (FICs) of selected short AMPs, 9-13mers, and different  
 31 antibiotic were determined against an MDR isolate of *P. aeruginosa* (PA 910). FICs were determined  
 32 in MHB, for the Indopt versions, 1/8 MHB was used. FIC values equal or smaller than 0.5 are  
 33 considered as synergistically interaction and highlighted in white colour on black background. FIC  
 34 values equal to or smaller than 0.6 (a 20% error margin) are considered as potentially synergistic and  
 35 were labelled in grey. Colour codes and abbreviations see Table 3. All peptides that showed FIC  
 36 values equal or smaller than 0.5 in the first experiment (see Table 3) that were not included in this  
 37 confirmation study are labelled with n.d..

38

39 To test whether the observed synergy was dependent on the selected strain or not, two additional MDR  
 40 PA isolates (PA253 and PA919) were used to determine the FICs of the selected peptides used with  
 41 Polymyxin B, see Table 5.

42

| Name             | Sequence      | MDR - PA910 | MDR - PA253 | MDR - PA919 |
|------------------|---------------|-------------|-------------|-------------|
| <b>Indopt 4</b>  | FIKWRFRRWKKRK | 0.29        | 0.29        | 0.38        |
| <b>Indopt 8</b>  | ILKWKKGWKKWFR | 0.29        | 0.31        | 0.38        |
| <b>Indopt 3</b>  | FIKWRSRWKKRT  | 0.33        | 0.19        | 0.38        |
| <b>Indopt 5</b>  | FIKWKFRPWKKRT | 0.33        | 0.13        | 0.38        |
| <b>Indopt 1</b>  | FIKWKKRWKKRT  | 0.35        | 0.38        | 0.38        |
| <b>Indopt 2</b>  | FIKWRFRRWKKRT | 0.38        | 0.31        | 0.38        |
| <b>Indopt 6</b>  | FIKRKSRWKKWRT | 0.38        | 0.26        | 0.38        |
| <b>Indopt 7</b>  | ILKWKRKWWKWFR | 0.38        | 0.52        | 0.29        |
| <b>LOP5</b>      | WKWLKKWIK     | 0.38        | 0.25        | 0.38        |
| <b>LOP3</b>      | KRRWRIWLV     | 0.40        | 0.31        | 0.56        |
| <b>R11</b>       | RLARIVVIRVRR  | 0.42        | 0.56        | 0.56        |
| <b>Bac034</b>    | VRLRIRVAVIRA  | 0.43        | 0.38        | 0.38        |
| <b>HHC53</b>     | FRRWWKWFK     | 0.46        | 0.63        | 0.50        |
| <b>Indopt 10</b> | ILKWKIFKWKWFR | 0.46        | 0.50        | 0.38        |
| <b>Indopt 11</b> | ILKWKTKWKKWFR | 0.46        | 0.50        | 0.29        |
| <b>R3</b>        | RLRRIVIRVAR   | 0.46        | 0.50        | 0.63        |

|                  |               |      |      |      |
|------------------|---------------|------|------|------|
| <b>Indopt 12</b> | ILKWKMFKWKWFR | 0.48 | 0.50 | 0.27 |
| <b>Indopt 9</b>  | ILKWKRKWKWRR  | 0.54 | 0.63 | 0.50 |
| <b>Sub7</b>      | RLWRIVVIRVKR  | 0.67 | 0.50 | 0.50 |

43 **Table 5** FIC values of selected peptides for three different MDR *P. aeruginosa* strains against  
44 Polymyxin B. Values from MDR-PA910 are mean values from at least three different measurements  
45 ( $n=3$ ), values from MDR-PA253 and MDR-PA919 are measured once ( $n=1$ ). Table is sorted according  
46 the values from MDR-PA910, from low to high.

47

## 48 Discussion

49

50 *P. aeruginosa* is ranked amongst the top five organisms causing bloodstream, urinary tract, pulmonary,  
51 surgical site and soft tissue infections in patient in intensive care units (Veesenmeyer et al., 2009). The  
52 bacterium is widely distributed in the environment, as it can utilize a wide range of materials for its  
53 nutrients, whilst only requiring a limited amount of nutrients to survive (Abdelraouf et al., 2011). The  
54 current treatment regimen for multi-drug resistant cases being limited to the last resort antibiotic  
55 colistin (Hachem et al., 2007; Sabuda et al., 2008). However, alarmingly there have been reports of *P.*  
56 *aeruginosa* resistance to colistin (Goli et al., 2016). The situation is getting very concerning, in fact the  
57 World Health Organization has declared it to be a “critical priority pathogen,” on which research and  
58 development of novel antibiotics should be focused (Tacconelli et al., 2018).

59 We confirmed the described multi-drug resistance of *P. aeruginosa* strains that were isolated in clinical  
60 and municipal waste water, see Table 1 (Schwartz et al., 2006). It has been reported that antimicrobial  
61 peptides (AMPs) show synergy with conventional antibiotics both in planktonic and biofilm growth  
62 (Giacometti et al., 2000; Jorge et al., 2017). Here we studied if a set of short antimicrobial peptides  
63 that we have developed in previous projects can synergize with antibiotics in order to revive them. We  
64 also included Polymyxin B, since treatment failures with monotherapy of Polymyxins are reportedly  
65 increasing making it an urgent candidate for use with synergistic agents. There are currently clinical  
66 trials investigating Colistin alone versus Colistin in combination with Meropenem (ClinicalTrials.gov  
67 IDs NCT01732250 and NCT01597973) (Lenhard et al., 2016).

68 The FICs between combinations of antibiotics and peptides show several enhanced synergistic effects  
69 by using antibiotics in tandem with short AMPs. In general, the beta-lactams and beta-lactam like  
70 antibiotics show the lowest amount of synergy, along with Ciprofloxacin, a gyrase inhibitor, which  
71 also showed a rather low amount of synergy. Cefepime and Piperacillin showed no detectable synergy  
72 at all. Whereas, antibiotics acting on the ribosome show a higher amount of synergy, with the highest  
73 proportion of synergy observed with Polymyxin B, which acts on the cell wall and cell membrane. The  
74 majority of the results were confirmed by three independent measurements of the selected  
75 combinations. Some combinations however showed a larger FIC values as determined in the first  
76 screen, this proving the importance of verification of FIC data (Hsieh et al., 1993).

77 Polymyxin B binds to the lipid A portion of the lipopolysaccharides (LPS), to replace cationic ions like  
78  $\text{Ca}^{2+}$  and  $\text{Mg}^{2+}$  from the LPS layer (Morrison and Jacobs, 1976). This process destabilizes the LPS  
79 layer, leading to permeability changes and consequently to an “self-promoted uptake” (Hancock, 1997;  
80 Hermsen et al., 2003). This process destabilises the membrane and allows molecules to pass through

81 the membrane in both directions. It has been shown that Polymyxin B synergises with antibiotics  
82 (Abdul Rahim et al., 2015; Elemam et al., 2010; Zusman et al., 2013) as well with antimicrobial  
83 peptides (Draper et al., 2013; Giacometti et al., 2000; van der Linden et al., 2009). The majority of  
84 short cationic peptides used in these studies also showed synergistic interaction with Polymyxin B  
85 (Table 4). This synergy was verified for two additional strains (Table 5). Small changes in the sequence  
86 of Bac2A leads to a loss in synergy, this is especially pronounced by the introduction of a tryptophan  
87 residue, for example W3, Sub3, W10 and S-W3. The data suggests that an additional tryptophan  
88 residue might anchor the peptide more in the membrane and consequently does not support synergy  
89 with Polymyxin B.

90 Cefepime is a fourth-generation cephalosporin antibiotic that has an extended spectrum of activity  
91 against Gram-positive and Gram-negative bacteria and is more stable as compared to third-generation  
92 agents (Wynd and Paladino, 1996). Cefepime has good activity against multi-drug resistant  
93 *Streptococcus pneumoniae*. Cephalosporins are bactericidal that disrupts the synthesis of the  
94 peptidoglycan layer of the bacterial cell walls by blocking transpeptidases known as penicillin binding  
95 proteins (PBPs) (Klein and Cunha, 1995). There was no synergistic effect observed, indicating that the  
96 peptides did not improved access to target sites or that they interfered with the lactamases. Ceftazidime  
97 is a third-generation cephalosporin antibiotic targeting PBPs. Similar to Cefepime there were no  
98 synergistic combinations determined with the exception of Bac034, W10 and LOP5. Meropenem, a  
99 carbapenem type beta-lactam antibiotic active against Gram-positive and Gram-negative bacteria,  
100 blocks PBPs and shows a bactericidal activity (Blumer, 1997). In contrast to Cefepime, a range of short  
101 AMPs showed synergistic interaction. Imipenem on the other hand, another carbapenem type beta-  
102 lactam with the same mode of action, did show three synergistic interactions; however, in the  
103 confirmation experiment (Table 4) these were not verified (Park and Parker, 1986). We conclude that  
104 synergy is caused by a Meropenem-specific feature, for example increasing the uptake rate for this  
105 molecule. Piperacillin is a penicillin beta-lactam antibiotic used mainly for gram-positive organisms.  
106 Piperacillin demonstrates bactericidal activity as a result of the inhibition of cell wall synthesis by  
107 binding to PBPs. Piperacillin is stable against hydrolysis by a variety of beta-lactamases, including  
108 penicillinases, cephalosporinases and extended spectrum beta-lactamases (Eliopoulos and Moellering,  
109 1982). No synergistic combinations were observed for Piperacillin with the short AMPs tested.

110

111 Kanamycin (Kanamycin A) belongs to the aminoglycoside class and is a natural compound found in  
112 *Streptomyces kanamyceticus* (de Lima Procópio et al., 2012). Aminoglycosides bind to the 30S subunit  
113 of the ribosome: most binding occurs on the 16 srRNA of the bacteria leading to a bactericidal action  
114 (Walter et al., 1999). It shows broad-spectrum activity against Gram-negative bacteria and some  
115 activity against Gram-positive. From all the aminoglycosides, Kanamycin shows the least activity and  
116 the least confirmed synergy. Tobramycin, is produced in *Streptomyces tenebrarius* and belongs to the  
117 class of aminoglycoside antibiotics. It binds irreversible to the 30S ribosomal subunit and shows a  
118 broad-spectrum activity, especially effective against *P. aeruginosa*  
119 (<https://www.drugbank.ca/drugs/DB00684>). Gentamicin is an aminoglycoside antibiotic that is  
120 produced by *Micromonospora purpurea* and acts on the 30S subunit. It is highly active against Gram-  
121 negative bacteria and shows activity against some Gram-positive bacteria (Daniels et al., 1975).  
122 Amikacin is a semi-synthetic antibiotic based on Kanamycin A, both members of the class  
123 aminoglycosides, which binds to the 30S subunit and 16 srRNA. Amikacin demonstrates a broad-  
124 spectrum activity towards Gram-negative bacteria, including pseudomonades and has some effects on  
125 Gram-positive bacteria, including *Staphylococcus aureus* (Ristuccia and Cunha, 1985). The synergy  
126 patterns of Tobramycin, Gentamicin and Amikacin are very similar to the synergy pattern of

127 Indolicidin, especially to the variants of Indopt 1-8. This is in accordance to research published by  
128 Boehr et al., showing that Indolicidin and analogues (differ from the ones in this study) are able to  
129 inhibit aminoglycoside phosphotransferase and aminoglycosides acetyltransferase. Through this  
130 inhibition the most effective resistance mechanism can be weakened (Boehr et al., 2003). Based on  
131 these findings a further optimization of Indopt peptides could lead to the formation of more potent  
132 inhibitors to overcome aminoglycosides resistance.

133 Erythromycin is a macrolide antibiotic produced by *Saccharopolyspora erythraea* and reversibly binds  
134 to the 50S subunit of the bacterial ribosome (<https://www.drugbank.ca/drugs/DB00199>). It is active  
135 against Gram-negative and Gram-positive bacteria. Tetracycline is a natural produced antibiotic by  
136 *Streptomyces aureofaciens* and binds reversibly to the 30S subunit as well as to some extent also the  
137 50S subunit, with potential influence over the bacterial membrane  
138 (<https://www.drugbank.ca/drugs/DB00759>). Tetracycline belongs to the class of tetracyclines and is a  
139 broad-spectrum antibiotic with activity against Gram-positive and Gram-negative bacteria. The  
140 synergy patterns for these two classes look different from the aminoglycosides. There is a broader  
141 range of peptides that can synergise with these antibiotics for example Bac2A variants, 9mer variants  
142 and the indolicidin variants.

143

144 Ciprofloxacin is a synthetic antibiotic belonging to the fluoroquinolones and is an inhibitor of the  
145 bacterial topoisomerase II (DNA gyrase) and topoisomerase IV. Ciprofloxacin is a broad-spectrum  
146 antibiotic with a wide range of Gram-positive and Gram-negative bacteria  
147 (<https://www.drugbank.ca/drugs/DB00199>). There are only few peptides showing synergy, all at 0.5  
148 and confirmation studies showed even higher values for the selected combinations.

149

150 In summary, our data shows that small antimicrobial peptides that can kill multi-drug resistant bacteria,  
151 in this case MDR *Pseudomonas aeruginosa*, are able to synergise with conventional antibiotics despite  
152 the fact that they are not effective anymore. We believe that this shows the potential to develop these  
153 molecules not only as mono-therapeutic agents, but also as part of a combination therapy with the  
154 conventional antibiotics to re-use antibiotics by this synergistic approach with AMPs. This can be an  
155 alternative avenue for dealing with the resistance crisis.

156

## 157 Literature

158

159 Abdelraouf, K., Kabbara, S., Ledesma, K. R., Poole, K., and Tam, V. H. (2011). Effect of multidrug  
160 resistance-conferring mutations on the fitness and virulence of *Pseudomonas aeruginosa*. *J.*  
161 *Antimicrob. Chemother.* 66, 1311–7. doi:10.1093/jac/dkr105.

162 Abdul Rahim, N., Cheah, S.-E., Johnson, M. D., Yu, H., Sidjabat, H. E., Boyce, J., et al. (2015).  
163 Synergistic killing of NDM-producing MDR *Klebsiella pneumoniae* by two ‘old’ antibiotics—  
164 polymyxin B and chloramphenicol. *J. Antimicrob. Chemother.* 70, 2589–2597.  
165 doi:10.1093/jac/dkv135.

- 166 Andersson, D. I., and Hughes, D. (2014). Microbiological effects of sublethal levels of antibiotics.  
167 *Nat. Rev. Microbiol.* 12, 465–478. doi:10.1038/nrmicro3270.
- 168 Baquero, F., Tedim, A. P., and Coque, T. M. (2013). Antibiotic resistance shaping multi-level  
169 population biology of bacteria. *Front. Microbiol.* 4, 15. doi:10.3389/fmicb.2013.00015.
- 170 Berendonk, T. U., Manaia, C. M., Merlin, C., Fatta-Kassinos, D., Cytryn, E., Walsh, F., et al. (2015).  
171 Tackling antibiotic resistance: the environmental framework. *Nat. Rev. Microbiol.* 13, 310–317.  
172 doi:10.1038/nrmicro3439.
- 173 Bhagirath, A. Y., Li, Y., Somayajula, D., Dadashi, M., Badr, S., and Duan, K. (2016). Cystic fibrosis  
174 lung environment and *Pseudomonas aeruginosa* infection. *BMC Pulm. Med.* 16, 174.  
175 doi:10.1186/s12890-016-0339-5.
- 176 Blumer, J. L. (1997). Meropenem: evaluation of a new generation carbapenem. *Int. J. Antimicrob.*  
177 *Agents* 8, 73–92. Available at: <http://www.ncbi.nlm.nih.gov/pubmed/18611786> [Accessed  
178 October 29, 2018].
- 179 Boehr, D. D., Draker, K., Koteva, K., Bains, M., Hancock, R. E., and Wright, G. D. (2003). Broad-  
180 spectrum peptide inhibitors of aminoglycoside antibiotic resistance enzymes. *Chem. Biol.* 10,  
181 189–96. Available at: <http://www.ncbi.nlm.nih.gov/pubmed/12618191> [Accessed June 20,  
182 2018].
- 183 Breidenstein, E. B. M., de la Fuente-Núñez, C., and Hancock, R. E. W. (2011). *Pseudomonas*  
184 *aeruginosa*: all roads lead to resistance. *Trends Microbiol.* 19, 419–26.  
185 doi:10.1016/j.tim.2011.04.005.
- 186 Bush, K., Courvalin, P., Dantas, G., Davies, J., Eisenstein, B., Huovinen, P., et al. (2011). Tackling  
187 antibiotic resistance. *Nat. Rev. Microbiol.* 9, 894–6. doi:10.1038/nrmicro2693.
- 188 Cantón, R., and Morosini, M.-I. (2011). Emergence and spread of antibiotic resistance following  
189 exposure to antibiotics. *FEMS Microbiol. Rev.* 35, 977–991. doi:10.1111/j.1574-  
190 6976.2011.00295.x.
- 191 Cherkasov, A., Hilpert, K., Jenssen, H., Fjell, C. D., Waldbrook, M., Mullaly, S. C., et al. (2009).  
192 Use of artificial intelligence in the design of small peptide antibiotics effective against a broad  
193 spectrum of highly antibiotic-resistant superbugs. *ACS Chem. Biol.* 4. doi:10.1021/cb800240j.
- 194 Czaplewski, L., Bax, R., Clokie, M., Dawson, M., Fairhead, H., Fischetti, V. A., et al. (2016).  
195 Alternatives to antibiotics—a pipeline portfolio review. *Lancet Infect. Dis.* 16.  
196 doi:10.1016/S1473-3099(15)00466-1.
- 197 Daniels, P. J., Luce, C., and Nagabhushan, T. L. (1975). The gentamicin antibiotics. 6. Gentamicin  
198 C2b, an aminoglycoside antibiotic produced by *Micromonospora purpurea* mutant JI-33. *J.*  
199 *Antibiot. (Tokyo)*. 28, 35–41. Available at: <http://www.ncbi.nlm.nih.gov/pubmed/1092638>  
200 [Accessed October 29, 2018].
- 201 Davies, J., and Davies, D. (2010). Origins and evolution of antibiotic resistance. *Microbiol. Mol.*  
202 *Biol. Rev.* 74, 417–33. doi:10.1128/MMBR.00016-10.



- 203 de Lima Procópio, R. E., da Silva, I. R., Martins, M. K., de Azevedo, J. L., and de Araújo, J. M.  
204 (2012). Antibiotics produced by *Streptomyces*. *Brazilian J. Infect. Dis.* 16, 466–471.  
205 doi:10.1016/j.bjid.2012.08.014.
- 206 Draper, L. A., Cotter, P. D., Hill, C., and Ross, R. P. (2013). The two peptide lantibiotic lactacin 3147  
207 acts synergistically with polymyxin to inhibit Gram negative bacteria. *BMC Microbiol.* 13, 212.  
208 doi:10.1186/1471-2180-13-212.
- 209 Elemam, A., Rahimian, J., and Doymaz, M. (2010). In Vitro Evaluation of Antibiotic Synergy for  
210 Polymyxin B-Resistant Carbapenemase-Producing *Klebsiella pneumoniae*. *J. Clin. Microbiol.*  
211 48, 3558–3562. doi:10.1128/JCM.01106-10.
- 212 Eliopoulos, G. M., and Moellering, R. C. (1982). Azlocillin, mezlocillin, and piperacillin: new broad-  
213 spectrum penicillins. *Ann. Intern. Med.* 97, 755–60. Available at:  
214 <http://www.ncbi.nlm.nih.gov/pubmed/6215872> [Accessed October 29, 2018].
- 215 Ellington, M. J., and Woodford, N. (2006). Fluoroquinolone resistance and plasmid addiction  
216 systems: self-imposed selection pressure? *J. Antimicrob. Chemother.* 57, 1026–1029.  
217 doi:10.1093/jac/dkl110.
- 218 European Committee for Antimicrobial Susceptibility Testing (EUCAST) of the European Society of  
219 Clinical Microbiology and Infectious Diseases (ESCMID) (2000). EUCAST Definitive  
220 Document E.Def 1.2, May 2000: Terminology relating to methods for the determination of  
221 susceptibility of bacteria to antimicrobial agents. *Clin. Microbiol. Infect.* 6, 503–8. Available at:  
222 <http://www.ncbi.nlm.nih.gov/pubmed/11168186> [Accessed June 20, 2018].
- 223 Giacometti, A., Cirioni, O., Del Prete, M. S., Paggi, A. M., D’Errico, M. M., and Scalise, G. (2000).  
224 Combination studies between polycationic peptides and clinically used antibiotics against Gram-  
225 positive and Gram-negative bacteria. *Peptides* 21, 1155–60. Available at:  
226 <http://www.ncbi.nlm.nih.gov/pubmed/11035200> [Accessed June 20, 2018].
- 227 Goli, H. R., Nahaei, M. R., Ahangarzadeh Rezaee, M., Hasani, A., Samadi Kafil, H., and Aghazadeh,  
228 M. (2016). Emergence of colistin resistant *Pseudomonas aeruginosa* at Tabriz hospitals, Iran.  
229 *Iran. J. Microbiol.* 8, 62–9. Available at: <http://www.ncbi.nlm.nih.gov/pubmed/27092226>  
230 [Accessed June 20, 2018].
- 231 Greber, K. E., and Dawgul, M. (2017). Antimicrobial Peptides Under Clinical Trials. *Curr. Top.*  
232 *Med. Chem.* 17, 620–628. Available at: <http://www.ncbi.nlm.nih.gov/pubmed/27411322>  
233 [Accessed June 20, 2018].
- 234 Hachem, R. Y., Chemaly, R. F., Ahmar, C. A., Jiang, Y., Boktour, M. R., Rjaili, G. A., et al. (2007).  
235 Colistin Is Effective in Treatment of Infections Caused by Multidrug-Resistant *Pseudomonas*  
236 *aeruginosa* in Cancer Patients. *Antimicrob. Agents Chemother.* 51, 1905–1911.  
237 doi:10.1128/AAC.01015-06.
- 238 Hancock, R. E. (1997). Peptide antibiotics. *Lancet* 349, 418–422. doi:10.1016/S0140-  
239 6736(97)80051-7.
- 240 Hermsen, E. D., Sullivan, C. J., and Rotschafer, J. C. (2003). Polymyxins: pharmacology,  
241 pharmacokinetics, pharmacodynamics, and clinical applications. *Infect. Dis. Clin. North Am.* 17,

- 242 545–62. Available at: <http://www.ncbi.nlm.nih.gov/pubmed/14711076> [Accessed June 20,  
243 2018].
- 244 Hilpert, K., Elliott, M. R., Volkmer-Engert, R., Henklein, P., Donini, O., Zhou, Q., et al. (2006).  
245 Sequence Requirements and an Optimization Strategy for Short Antimicrobial Peptides. *Chem.*  
246 *Biol.* 13. doi:10.1016/j.chembiol.2006.08.014.
- 247 Hilpert, K., Volkmer-Engert, R., Walter, T., and Hancock, R. E. W. (2005). High-throughput  
248 generation of small antibacterial peptides with improved activity. *Nat. Biotechnol.* 23.  
249 doi:10.1038/nbt1113.
- 250 Hsieh, M. H., Yu, C. M., Yu, V. L., and Chow, J. W. (1993). Synergy assessed by checkerboard. A  
251 critical analysis. *Diagn. Microbiol. Infect. Dis.* 16, 343–9. Available at:  
252 <http://www.ncbi.nlm.nih.gov/pubmed/8495592> [Accessed October 29, 2018].
- 253 Jorge, P., Grzywacz, D., Kamysz, W., Lourenço, A., and Pereira, M. O. (2017). Searching for new  
254 strategies against biofilm infections: Colistin-AMP combinations against *Pseudomonas*  
255 *aeruginosa* and *Staphylococcus aureus* single- and double-species biofilms. *PLoS One* 12,  
256 e0174654. doi:10.1371/journal.pone.0174654.
- 257 Klein, N. C., and Cunha, B. A. (1995). Third-generation cephalosporins. *Med. Clin. North Am.* 79,  
258 705–719. doi:10.1016/S0025-7125(16)30034-7.
- 259 Kohanski, M. A., DePristo, M. A., and Collins, J. J. (2010). Sublethal antibiotic treatment leads to  
260 multidrug resistance via radical-induced mutagenesis. *Mol. Cell* 37, 311–20.  
261 doi:10.1016/j.molcel.2010.01.003.
- 262 Lenhard, J. R., Nation, R. L., and Tsuji, B. T. (2016). Synergistic combinations of polymyxins. *Int. J.*  
263 *Antimicrob. Agents* 48, 607–613. doi:10.1016/j.ijantimicag.2016.09.014.
- 264 Mikut, R., Ruden, S., Reischl, M., Breitling, F., Volkmer, R., and Hilpert, K. (2016). Improving short  
265 antimicrobial peptides despite elusive rules for activity. *Biochim. Biophys. Acta - Biomembr.*  
266 1858. doi:10.1016/j.bbamem.2015.12.013.
- 267 Morrison, D. C., and Jacobs, D. M. (1976). Binding of polymyxin B to the lipid A portion of  
268 bacterial lipopolysaccharides. *Immunochemistry* 13, 813–8. Available at:  
269 <http://www.ncbi.nlm.nih.gov/pubmed/187544> [Accessed June 20, 2018].
- 270 Odds, F. C. (2003). Synergy, antagonism, and what the checkerboard puts between them. *J.*  
271 *Antimicrob. Chemother.* 52, 1. doi:10.1093/jac/dkg301.
- 272 Oh, H., Stenhoff, J., Jalal, S., and Wretling, B. (2003). Role of efflux pumps and mutations in genes  
273 for topoisomerases II and IV in fluoroquinolone-resistant *Pseudomonas aeruginosa* strains.  
274 *Microb. Drug Resist.* 9, 323–8. doi:10.1089/107662903322762743.
- 275 Park, S. Y., and Parker, R. H. (1986). Review of imipenem. *Infect. Control* 7, 333–7. Available at:  
276 <http://www.ncbi.nlm.nih.gov/pubmed/3519499> [Accessed October 29, 2018].
- 277 Ristuccia, A. M., and Cunha, B. A. (1985). An overview of amikacin. *Ther. Drug Monit.* 7, 12–25.  
278 Available at: <http://www.ncbi.nlm.nih.gov/pubmed/3887667> [Accessed October 29, 2018].

- 279 Sabuda, D. M., Laupland, K., Pitout, J., Dalton, B., Rabin, H., Louie, T., et al. (2008). Utilization of  
280 colistin for treatment of multidrug-resistant *Pseudomonas aeruginosa*. *Can. J. Infect. Dis. Med.*  
281 *Microbiol. = J. Can. des Mal. Infect. la Microbiol. medicale* 19, 413–8. Available at:  
282 <http://www.ncbi.nlm.nih.gov/pubmed/19436571> [Accessed June 20, 2018].
- 283 Schwartz, T., Volkmann, H., Kirchen, S., Kohnen, W., Schön-Hölz, K., Jansen, B., et al. (2006).  
284 Real-time PCR detection of *Pseudomonas aeruginosa* in clinical and municipal wastewater and  
285 genotyping of the ciprofloxacin-resistant isolates. *FEMS Microbiol. Ecol.* 57, 158–67.  
286 doi:10.1111/j.1574-6941.2006.00100.x.
- 287 Seiler, C., and Berendonk, T. U. (2012). Heavy metal driven co-selection of antibiotic resistance in  
288 soil and water bodies impacted by agriculture and aquaculture. *Front. Microbiol.* 3, 399.  
289 doi:10.3389/fmicb.2012.00399.
- 290 Selsted, M. E., Novotny, M. J., Morris, W. L., Tang, Y. Q., Smith, W., and Cullor, J. S. (1992).  
291 Indolicidin, a novel bactericidal tridecapeptide amide from neutrophils. *J. Biol. Chem.* 267,  
292 4292–5. Available at: <http://www.ncbi.nlm.nih.gov/pubmed/1537821> [Accessed June 21, 2018].
- 293 Sköld, O. (2000). Sulfonamide resistance: mechanisms and trends. *Drug Resist. Updat.* 3, 155–160.  
294 doi:10.1054/drup.2000.0146.
- 295 Tacconelli, E., Carrara, E., Savoldi, A., Harbarth, S., Mendelson, M., Monnet, D. L., et al. (2018).  
296 Discovery, research, and development of new antibiotics: the WHO priority list of antibiotic-  
297 resistant bacteria and tuberculosis. *Lancet Infect. Dis.* 18, 318–327. doi:10.1016/S1473-  
298 3099(17)30753-3.
- 299 van der Linden, D. S., Short, D., Dittmann, A., and Yu, P.-L. (2009). Synergistic effects of ovine-  
300 derived cathelicidins and other antimicrobials against *Escherichia coli* O157:H7 and  
301 *Staphylococcus aureus* 1056 MRSA. *Biotechnol. Lett.* 31, 1265–7. doi:10.1007/s10529-009-  
302 0010-9.
- 303 Veessenmeyer, J. L., Hauser, A. R., Lisboa, T., and Rello, J. (2009). *Pseudomonas aeruginosa*  
304 virulence and therapy: evolving translational strategies. *Crit. Care Med.* 37, 1777–86.  
305 doi:10.1097/CCM.0b013e31819ff137.
- 306 Walter, F., Vicens, Q., and Westhof, E. (1999). Aminoglycoside-RNA interactions. *Curr. Opin.*  
307 *Chem. Biol.* 3, 694–704. Available at: <http://www.ncbi.nlm.nih.gov/pubmed/10600721>  
308 [Accessed October 29, 2018].
- 309 Wiegand, I., Hilpert, K., and Hancock, R. E. W. (2008). Agar and broth dilution methods to  
310 determine the minimal inhibitory concentration (MIC) of antimicrobial substances. *Nat. Protoc.*  
311 3. doi:10.1038/nprot.2007.521.
- 312 Winn Jr, W., Allen, S., Koneman, E., Procop, G., Schreckenberger, P., and Gail, W. (2006).  
313 *Koneman's Color Atlas and Textbook of Diagnostic Microbiolog.* 6th ed. , ed. N. Peterson  
314 Baltimore.
- 315 Wright, G. D., and Sutherland, A. D. (2007). New strategies for combating multidrug-resistant  
316 bacteria. *Trends Mol. Med.* 13, 260–267. doi:10.1016/j.molmed.2007.04.004.

- 317 Wu, M., and Hancock, R. E. (1999). Improved derivatives of bactenecin, a cyclic dodecameric  
318 antimicrobial cationic peptide. *Antimicrob. Agents Chemother.* 43, 1274–6. Available at:  
319 <http://www.ncbi.nlm.nih.gov/pubmed/10223951> [Accessed June 20, 2018].
- 320 Wynd, M. A., and Paladino, J. A. (1996). Cefepime: A Fourth-Generation Parenteral Cephalosporin.  
321 *Ann. Pharmacother.* 30, 1414–1424. doi:10.1177/106002809603001211.
- 322 Yoneda, K., Chikumi, H., Murata, T., Gotoh, N., Yamamoto, H., Fujiwara, H., et al. (2005).  
323 Measurement of *Pseudomonas aeruginosa* multidrug efflux pumps by quantitative real-time  
324 polymerase chain reaction. *FEMS Microbiol. Lett.* 243, 125–31.  
325 doi:10.1016/j.femsle.2004.11.048.
- 326 Zusman, O., Avni, T., Leibovici, L., Adler, A., Friberg, L., Stergiopoulou, T., et al. (2013).  
327 Systematic Review and Meta-Analysis of *In Vitro* Synergy of Polymyxins and Carbapenems.  
328 *Antimicrob. Agents Chemother.* 57, 5104–5111. doi:10.1128/AAC.01230-13.
- 329
- 330
